# Supplementary material for: Hexamethyldisiloxane Removal from Biogas Using a Fe3O4–Urea-Modified Three-Dimensional Graphene Aerogel
Source: MDPI journal article supplement (doi:10.3390/molecules28186622), 2023-09-14
Supplement: s1 [file s1]

## Supplementary information

# Hexamethyldisiloxane Removal from Biogas Using a Fe<sub>3</sub>O<sub>4</sub>-Urea-Modified Three-Dimensional Graphene Aerogel

Siqi Lv <sup>1</sup>, Xifeng Hou <sup>3</sup>, Yanhui Zheng <sup>1,2,\*</sup> and Zichuan Ma <sup>1,\*</sup>

<sup>1</sup> Hebei Key Laboratory of Inorganic Nano-Materials, College of Chemistry and Material Sciences, Hebei Normal University, Shijiazhuang 050024, China; lvsq@stu.hebtu.edu.cn (S.L.)

<sup>2</sup> College of Chemical Technology, Shijiazhuang University, Shijiazhuang 050035, China

<sup>3</sup> Hebei Key Laboratory of Animal Physiology, Biochemistry and Molecular Biology, College of Life Sciences, Hebei Normal University, Shijiazhuang, Hebei 050024, China; houxf@stu.hebtu.edu.cn (X.H.)

\* Correspondence: zhengyh0308@stu.hebtu.edu.cn (Y.Z.); mazc@hebtu.edu.cn (Z.M.);

Tel.: +86-0311-80787400 (Z.M.)

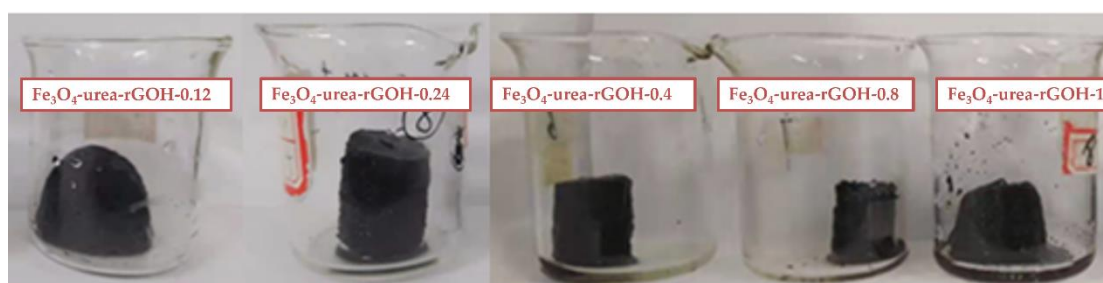

Figure S1. Photographs of the Fe<sub>3</sub>O<sub>4</sub>-urea-rGOHs.

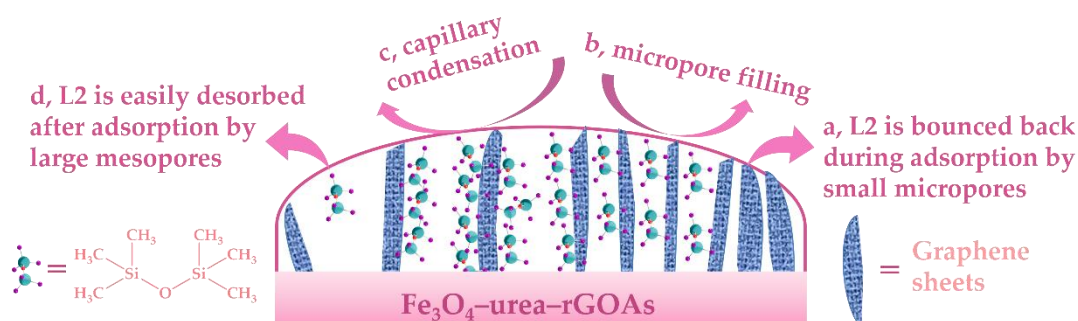

Figure S2. The schematic diagram of the adsorption mechanism of L2 on the Fe<sub>3</sub>O<sub>4</sub>-urea-rGOAs.

Table S1. Adsorption and regeneration capacities of different porous carbon materials for VMS.

| Adsorbent                                     | Adsorbed gas | $Q_m$ (mg g <sup>-1</sup> ) | Regeneration Method                                                    | RE <sup>a</sup> (%) | Ref.      |
|-----------------------------------------------|--------------|-----------------------------|------------------------------------------------------------------------|---------------------|-----------|
| AC                                            | D3           | 60–878                      | Heating at 100–200 °C                                                  | 50                  | [54]      |
| AC                                            | L2           | 10–100                      | Four-step heating treatment at 80–160 °C                               | 70–80               | [55]      |
| AC                                            | D4           | 526                         | By the oxidation with H <sub>2</sub> O <sub>2</sub> and O <sub>3</sub> | 40–92               | [56]      |
| FeMBC-3                                       | L2           | 356.4                       | Heating at 100 °C for 270 min                                          | 93                  | [41]      |
| Fe <sub>3</sub> O <sub>4</sub> -urea-rGOA-0.4 | L2           | 146.5                       | Heating at 80 °C for 30 min                                            | > 99                | This work |

<sup>a</sup> Regeneration efficiency after 1 cycle (RE).
